# Supplementary material
Source: PubMed Central journal article supplement (PMC4272433)

**SUPPLEMENTAL MATERIALS AND METHODS**

for

**Cdc42-Interacting Protein Bem4 Regulates the Filamentous Growth MAP Kinase Pathway**

by Andrew Pitoniak<sup>a\*</sup>, Colin Chavel<sup>a\*</sup>, Jacky Chow<sup>a</sup>, Jeremy Smith<sup>a</sup>, Diawoye Camara<sup>a</sup>, Sheelarani Karunanithi<sup>a</sup>, Ken Wolfe<sup>b</sup>, and Paul J. Cullen<sup>a†</sup>

**SUPPLEMENTAL FIGURE LEGENDS**

**Supplemental Figure 1. Role of Sbe2p/Sbe22p and septins in regulating Bem4p function in the filamentous growth pathway.** **A)** Sbe2p/Sbe22p do not regulate the filamentous growth pathway. Equal numbers of wild type (PC538), *bem4Δ* (PC3016), *sbe2Δ* (PC4056), *sbe22Δ* (PC3874), *sbe2Δ sbe22Δ* (PC4060), and *ste12Δ* (PC2382) cells were spotted onto SD+AA, SD-HIS, or YEPD plates and incubated for 3d. The *FUS1-HIS3* growth reporter (typically a mating pathway reporter but in a *ste4* strain shows dependence on filamentous growth pathway regulators) was used to evaluate the activity of the pathway of strains spotted onto SD+AA and SD-HIS (left panels). The plate-washing assay was used to evaluate the filamentation pathway by spotting cells onto YEPD media and performing the plate-washing assay (right panels). **B)** Overexpression of *SBE2* or *SBE22* does not rescue the signaling defect of a *bem4* mutant. Equal numbers of wild type (PC538) and *bem4Δ* (PC3016) cells containing either a control plasmid pRS316 (PC4204) or overexpression plasmids *pGAL-Sbe2* or *pGAL-Sbe22* (Open Biosystems) were spotted onto SGAL-URA (left) or SGAL-URA-HIS (right) plates and photographed after

being grown for 2d. C) The septin defect seen in the *bem4* mutant does not account for its role in the filamentation pathway. Wild type (PC538), *bem4Δ* (PC3016), and *ste12Δ* (PC2382) strains expressing pCdc12p-GFP (PC1364)(from J. Pringle) were grown to mid-log phase in YEPD, and protein localization was examined at 100X magnification. Cdc12p localization was observed in *bem4* mutants with normal (84%) and abnormal (15%) morphology. DIC, top panels; FITC bottom panels; Bar, 10 microns. Approximately 15% of *bem4* cells showed abnormal septin staining, whereas a >4-fold defect in MAPK activity was observed.

**Supplemental Figure 2. Bem4p regulates filamentous growth and the filamentous growth pathway.**

**A)** Examples of pseudohyphal growth of wild type (PC344) and *bem4Δ* (PC3908) homozygous diploid strains. Bar, 50 microns. **B)** Examples of diploid colonies producing pseudohyphae on nitrogen-limited medium. Boxed colonies were used for **Fig. 1D**. **C)** Activity of the cross talk reporter (*FUS1-HIS3*) in *ste4* mutants that contain the conditional protein glycosylation mutant *pmi40-101*. Equal numbers of *pmi40-101* (PC2148), *pmi40-101msb2Δ* (PC979), *pmi40-101sho1Δ* (PC448), *pmi40-101 bem4Δ* (PC3525), and *pmi40-101 ste12Δ* (PC389) cells were spotted onto YEPD or SD-HIS media supplemented with 200 mM mannose (High Man) or no mannose (Limiting Man). Plates were incubated for 48h and photographed. In high mannose, the glycosylation deficiency is suppressed, and cells are His<sup>-</sup>. In limiting mannose, the filamentous growth pathway is activated (His<sup>+</sup>), which is dependent on Msb2p, Sho1p, Bem4p, and Ste12p. Activation of the pathway contributes to viability of *pmi40-101*, as seen by the growth defect of the *msb2Δ*, *sho1Δ*, *bem4Δ*, and *ste12Δ* mutants on YEPD limiting mannose. **D)** P~ Kss1p in the *pmi40-101* mutant +/-50 mM mannose (+). Asterisk refers to a

Kss1p-dependent band seen in some conditions. **E)** Pectinase assay showing secretion of pectinase in the indicated mutants. **F)** Flo11p-HA shedding in wild-type cells and the *bem4Δ* and *ste12Δ* mutants. Colonies were grown on nitrocellulose filters on YEPD media for 2d (top panel). After washing, the filter was probed by anti-HA antibodies to detect shed Flo11p-HA. The level of Flo11p-HA shedding was determined by densitometry by ImageJ of immunoblots following background subtraction. Values were normalized to colony area and set to a value of 1 for wild type. Other values were determined accordingly. Flo11p-HA shedding was measured at 1d and 2d time periods; the 2d time period is shown.

**Supplemental Figure 3. Role of Bem4p in regulating the mating pathway.** **A)** Shmoo formation. Strains were grown to mid-log phase in YEPD and treated with 1mM of  $\alpha$ -factor for the times indicated. Shmoos were evaluated by microscopy. Time 0h, shmoos were counted prior to the addition of  $\alpha$ -factor. The average of two independent trials is shown; error bars show the standard deviation between trials. More than 300 cells were counted for each time point. **B)** Mating efficiency. Wild type, *bem4Δ*, and *ste12Δ* strains were grown to saturation and mixed for 8h at 30°C in YEPD. Diploid formation was assessed by the presence of antibiotic resistance markers. **C)** Quantitation of halo assay. Two concentrations ( $10^5$  and  $10^6$ ) of wild-type (PC313), *bem4Δ* (PC3343), *far1Δ* (PC623), and *ste12Δ* (PC350) cells were spread onto YEPD media. 1 $\mu$ M and 5 $\mu$ M of  $\alpha$ -factor were applied to plates, which were incubated for 24h at 30°C. The values represent the size of halos determined by quantifying the area using the circle tool in ImageJ. **D)** Clustering of GFP-Cdc42p in cells exposed to alpha factor. Wild type (PC313) and *bem4Δ* (PC3343) strains harboring pGFP-Cdc42p were grown to mid-log phase in YEPD. Cells were washed three times and treated with 5  $\mu$ M  $\alpha$ -factor. Values represent the percentage of

cells displaying polarization of GFP-Cdc42p at shmoo tips during the indicated time points. At least 200 cells were counted, and the experiment was performed in duplicate. **E)** Genetic suppression analysis for Fig. 3A.

**Supplemental Figure 4. Clustal W2 alignment of Bem4p with other proteins.** Homology between Bem4p and members of the Smg GDS family of proteins. Proteins that bear homology to Smg GDS proteins from *Homo sapiens* (Rap1, GTP-GDP dissociation stimulator 1, isoform CRA\_c, accession number EAX06070.1), *Mus musculus* (EDL12082.1), *Xenopus laevis* (NP\_001088766.1), *Drosophila melanogaster* (NP\_477305.1), and *S. cerevisiae* Bem4p (NP\_015164.1). Red, identical residues between Bem4p and at least 4 other proteins. Pink shows similarity for aliphatic (L, I, V) or charged (D and E) amino acids. The GEF domain is marked by a black box. The blue lines mark conserved regions of the GEF domain, which are not present in Bem4p. Manual alignments were made at positions 474 for Bem4p. Lower panel, Arm-like repeats in the Bem4p protein. Asterisk, fully conserved residue; colon, residues with strongly similar properties ( $> 0.5$  in Gonnet PAM 250 matrix); period; residues with weakly similar properties ( $\leq 0.5$  in the Gonnet PAM 250 matrix).

**Supplemental Figure 5. Yeast MAPK pathways that share components incorporating the discovery of Bem4p.** The mating, filamentous growth and HOG pathways shown as different pathways (A), or a core pathway with different pathway-specific regulators (B) in their respective colors. The discovery of Bem4p suggests that a core pathway (composed of Cdc42p, Ste20p, Ste11p, and Ste50p) diversified by the evolution of pathway-specific factors.

**Supplemental Figure 6. Role of Bem4p in the localization of GFP-Cdc42p.** **A)** Additional examples of cells expressing GFP-Cdc42p. Bar, 5 microns. **B)** Quantitation of the localization of GFP-Cdc42p from the cell interior to the cell exterior. The average fluorescence intensity for five cells is shown using the line feature of ImageJ. A line was drawn perpendicular to the plane of the PM. The first interior value was set to 100% for all samples; other values were adjusted accordingly. Samples were corrected against background levels. Raw data was averaged before background subtraction and adjustment to 100%. **C)** Example of fluorescence intensity from a single wild-type cell (top line) and a single *bem4* $\Delta$  mutant cell (bottom line).

## SUPPLEMENTAL TABLES

Table S1. Yeast strains.

| Strain              | Genotype                                                                                                              | Reference                      |
|---------------------|-----------------------------------------------------------------------------------------------------------------------|--------------------------------|
| BY4741 <sup>c</sup> | <i>MATa his3Δ0 leu2Δ0 ura3Δ0 met15Δ0</i>                                                                              | BRACHMANN <i>et al.</i> , 1998 |
| PC284               | <i>PJ69-4a MATa trp1-901 leu2-3,112 ura3-52 his3-200 gal14A gal18OA<br/>LYSZ::GAL1-HIS3 GAL2-ADE2 met2::GAL7-lacZ</i> | JAMES <i>et al.</i> , 1996     |
| PC312               | <i>MATa ura3-52</i>                                                                                                   | LIU <i>et al.</i> , 1993       |
| PC313               | <i>MATa ura3-52</i>                                                                                                   | LIU <i>et al.</i> , 1993       |
| PC344               | <i>MATa ura3-52 / MATa ura3-52</i>                                                                                    | CULLEN <i>et al.</i> , 2004    |
| PC350               | <i>MATa ura3-52 ste12::KIURA3</i>                                                                                     | This study                     |
| PC389 <sup>d</sup>  | <i>MATa ste4 FUS1-HIS3 ura3-52 pmi40-101 ste12::KIURA3</i>                                                            | CULLEN <i>et al.</i> , 2000    |
| PC446 <sup>d</sup>  | <i>MATa ste4 FUS1-HIS3 ura3-52 pmi40-101 ste50::KIURA3</i>                                                            | CULLEN <i>et al.</i> , 2000    |
| PC448 <sup>d</sup>  | <i>MATa ste4 FUS1-HIS3 ura3-52 pmi40-101 sho1::KIURA3</i>                                                             | CULLEN <i>et al.</i> , 2000    |
| PC479               | <i>MATa ste4 FUS1-lacZ FUS1-HIS3 ura3-52 rga2::KIURA3</i>                                                             | SMITH <i>et al.</i> 2002       |
| PC480               | <i>MATa ste4 FUS1-lacZ FUS1-HIS3 ura3-52 bem3::KIURA3</i>                                                             | SMITH <i>et al.</i> 2002       |
| PC522 <sup>d</sup>  | <i>MATa ste4 FUS1-HIS3 ura3-52 pmi40-101 ste20::KANMX6</i>                                                            | CULLEN <i>et al.</i> , 2000    |
| PC538 <sup>a</sup>  | <i>MATa ste4 FUS1-lacZ FUS1-HIS3 ura3-52</i>                                                                          | CULLEN <i>et al.</i> , 2004    |
| PC539               | <i>MATa ste4 FUS1-lacZ FUS1-HIS3 ura3-52 ste12::KIURA3</i>                                                            | PITONIAK <i>et al.</i> , 2009  |
| PC544               | <i>MATa ste4 FUS1-lacZ FUS1-HIS3 ura3-52</i>                                                                          | CULLEN and SPRAGUE, 2002       |
| PC549               | <i>MATa ste4 FUS1-lacZ FUS1-HIS3 ura3-52 ste20::URA3</i>                                                              | CULLEN and SPRAGUE, 2002       |
| PC551               | <i>MATa ste4 FUS1-lacZ FUS1-HIS3 ura3-52 pea2::KIURA3</i>                                                             | CULLEN and SPRAGUE, 2002       |
| PC552               | <i>MATa ste4 FUS1-lacZ FUS1-HIS3 ura3-52 hsl1::KIURA3</i>                                                             | CULLEN and SPRAGUE, 2000       |
| PC554               | <i>MATa ste4 FUS1-lacZ FUS1-HIS3 ura3-52 spa2::KIURA3</i>                                                             | CULLEN and SPRAGUE, 2002       |
| PC555               | <i>MATa ste4 FUS1-lacZ FUS1-HIS3 ura3-52 hsl7::KIURA3</i>                                                             | CULLEN and SPRAGUE, 2000       |
| PC559               | <i>MATa ste4 FUS1-lacZ FUS1-HIS3 ura3-52 gal4::KIURA3</i>                                                             | CULLEN and SPRAGUE, 2000       |
| PC560               | <i>MATa ste4 FUS1-lacZ FUS1-HIS3 ura3-52 snf1::URA3</i>                                                               | CULLEN and SPRAGUE, 2000       |
| PC563               | <i>MATa ste4 FUS1-lacZ FUS1-HIS3 ura3-52 bud8::KIURA3</i>                                                             | CULLEN and SPRAGUE, 2002       |
| PC568               | <i>MATa ste4 FUS1-lacZ FUS1-HIS3 ura3-52 sip4::KIURA3</i>                                                             | CULLEN and SPRAGUE, 2000       |
| PC587               | <i>MATa ste4 FUS1-lacZ FUS1-HIS3 ura3-52 snf4::KIURA3</i>                                                             | CULLEN and SPRAGUE, 2000       |
| PC622               | <i>MATa ste4 FUS1-lacZ FUS1-HIS3 ura3-52 GAL-SHO1::KanMX6</i>                                                         | CULLEN <i>et al.</i> , 2004    |
| PC623               | <i>MATa ura3-52 far1::KIURA3</i>                                                                                      | This study                     |
| PC624               | <i>MATa ste4 FUS1-lacZ FUS1-HIS3 ura3-52 GAL-SHO1::KanMX6<br/>ste12::KIURA3</i>                                       | PITONIAK <i>et al.</i> , 2009  |
| PC637               | <i>MATa ste4 FUS1-lacZ FUS1-HIS3 ura3-52 bud4::KIURA3</i>                                                             | CULLEN and SPRAGUE, 2002       |
| PC642               | <i>MATa ste4 FUS1-lacZ FUS1-HIS3 ura3-52 pbs2 sho1::KIURA3</i>                                                        | This study                     |
| PC644               | <i>MATa ste4 FUS1-lacZ FUS1-HIS3 ura3-52 pbs2 ste12::KIURA3</i>                                                       | This study                     |
| PC648               | <i>MATa ste4 FUS1-lacZ FUS1-HIS3 STE20<sup>CRIB</sup></i>                                                             | This study                     |
| PC673               | <i>MATa ste4 FUS1-lacZ FUS1-HIS3 ura3-52 ste20::KIURA3</i>                                                            | PITONIAK <i>et al.</i> , 2009  |
| PC717               | <i>MATa ste4 FUS1-lacZ FUS1-HIS3 ura3-52 rsr1::KIURA3</i>                                                             | CULLEN and SPRAGUE, 2002       |
| PC720               | <i>MATa ste4 FUS1-lacZ FUS1-HIS3 ura3-52 ste5::KIURA3</i>                                                             | This study                     |
| PC842               | <i>MATa ste4 FUS1-lacZ FUS1-HIS3 ura3-52 pGAL-GFP-<br/>BUD14::KIURA3</i>                                              | CULLEN and SPRAGUE 2002        |
| PC916               | <i>MATa ste4 FUS1-lacZ FUS1-HIS3 ura3-52 bud6::KIURA3</i>                                                             | CULLEN and SPRAGUE 2002        |
| PC948               | <i>MATa ste4 FUS1-lacZ FUS1-HIS3 ura3-52 msb2::KanMX6</i>                                                             | CULLEN <i>et al.</i> , 2004    |
| PC955               | <i>MATa ste4 FUS1-lacZ FUS1-HIS3 ura3-52 gip1::KanMX6</i>                                                             | This study                     |
| PC961               | <i>MATa ura3-52 msb2::KanMX6</i>                                                                                      | This study                     |
| PC967               | <i>MATa ste4 FUS1-lacZ FUS1-HIS3 ura3-52 mad2::KanMX6</i>                                                             | This study                     |
| PC968               | <i>MATa ste4 FUS1-lacZ FUS1-HIS3 ura3-52 mad3::KanMX6</i>                                                             | This study                     |
| PC969               | <i>MATa ste4 FUS1-lacZ FUS1-HIS3 ura3-52 cla4::KanMX6</i>                                                             | This study                     |
| PC986 <sup>b</sup>  | <i>MATa ura3-52 leu2 his3 trp1</i>                                                                                    | ROBERTS <i>et al.</i> , 2000   |
| PC979 <sup>d</sup>  | <i>MATa ste4 FUS1-HIS3 ura3-52 pmi40-101 msb2::KANMX6</i>                                                             | CULLEN <i>et al.</i> , 2000    |
| PC999               | <i>MATa ste4 FUS1-lacZ FUS1-HIS3 ura3-52 MSB2-HA</i>                                                                  | CULLEN <i>et al.</i> , 2004    |

|                     |                                                                                   |                                  |
|---------------------|-----------------------------------------------------------------------------------|----------------------------------|
| PC1029              | <i>MATa ste4 FUS1-lacZ FUS1-HIS3 ura3-52 flo11::KanMX6</i>                        | PITONIAK <i>et al.</i> , 2009    |
| PC1063              | <i>MATa ste4 FUS1-lacZ FUS1-HIS3 ura3-52 rdi1::KIURA3</i>                         | This study                       |
| PC1241              | <i>MATa ura3-52 msb2::HYG / MATa ura3-52 msb2::NAT</i>                            | CULLEN <i>et al.</i> , 2004      |
| PC1242              | <i>MATa ura3-52 sho1::HYG / MATa ura3-52 sho1::NAT</i>                            | CULLEN <i>et al.</i> , 2004      |
| PC1436              | <i>MATa ura3-52 leu2 his3 cdc24-4</i>                                             | A. Bender                        |
| PC1437              | <i>MATa ura3-52 leu2 his3 trp1 cdc42-1</i>                                        | D. Johnson                       |
| PC1509              | <i>MATa ura3-52 far1::NAT</i>                                                     | This study                       |
| PC1516              | <i>MATa ste4 FUS1-lacZ FUS1-HIS3 ura3-52 MSB2<sup>100-818</sup></i>               | VADAIE <i>et al.</i> , 2008      |
| PC1519              | <i>MATa ste4 FUS1-lacZ FUS1-HIS3 ura3-52 pgu1::KanMX6</i>                         | PITONIAK <i>et al.</i> , 2009    |
| PC1523              | <i>MATa ste4 FUS1-lacZ FUS1-HIS3 ura3-52 ssk1::NAT</i>                            | PITONIAK <i>et al.</i> , 2009    |
| PC1531              | <i>MATa ste4 FUS1-lacZ FUS1-HIS3 ura3-52 sho1::HYG</i>                            | CULLEN <i>et al.</i> , 2004      |
| PC1558              | <i>MATa ste4 FUS1-lacZ FUS1-HIS3 ura3-52 sho1::NAT ssk1::HYG</i>                  | This study                       |
| PC1620              | <i>MATa ste4 FUS1-lacZ FUS1-HIS3 ura3-52 MSB2<sup>100-818</sup> sho1::HYG</i>     | VADAIE <i>et al.</i> , 2008      |
| PC1811              | <i>MATa ste4 FUS1-lacZ FUS1-HIS3 ura3-52 MSB2<sup>100-818</sup> ste12::KIURA3</i> | VADAIE <i>et al.</i> , 2008      |
| PC1894              | <i>MATa ste4 FUS1-lacZ FUS1-HIS3 ura3-52 leu2::HYG</i>                            | CULLEN <i>et al.</i> , 2004      |
| PC1994              | <i>MATa ste4 FUS1-lacZ FUS1-HIS3 ura3-52 rga1::URA3</i>                           | SMITH <i>et al.</i> 2002         |
| PC2043              | <i>MATa ste4 FUS1-lacZ FUS1-HIS3 ura3-52 FLO11-HA</i>                             | KARUNANITHI <i>et al.</i> , 2010 |
| PC2053              | <i>MATa ste4 FUS1-lacZ FUS1-HIS3 ura3-52 pbs2::KanMX6</i>                         | PITONIAK <i>et al.</i> , 2009    |
| PC2061              | <i>MATa ste4 FUS1-lacZ FUS1-HIS3 ura3-52 ssk1::NAT ste11::KIURA3</i>              | PITONIAK <i>et al.</i> , 2009    |
| PC2110              | <i>MATa ste4 fus1-lacZ::NAT FUS1-HIS3 ura3-52 pbs2::KanMX6</i>                    | PITONIAK <i>et al.</i> , 2009    |
| PC2148 <sup>d</sup> | <i>MATa ste4 FUS1-HIS3 ura3-52 pmi40-101</i>                                      | CULLEN <i>et al.</i> , 2000      |
| PC2184              | <i>MATa leu2::ura3 ste12::KIURA3</i>                                              | PITONIAK <i>et al.</i> , 2009    |
| PC2382              | <i>MATa ste4 FUS1-lacZ FUS1-HIS3 ura3-52 ste12::KanMX6</i>                        | This study                       |
| PC2519              | <i>MATa ste4 fus1-lacZ::NAT FUS1-HIS3 ura3-52</i>                                 | PITONIAK <i>et al.</i> , 2009    |
| PC2522              | <i>MATa ste4 fus1-lacZ::NAT FUS1-HIS3 ura3-52 sho1::KanMX6</i>                    | PITONIAK <i>et al.</i> , 2009    |
| PC2544              | <i>MATa ste4 fus1-lacZ::NAT FUS1-HIS3 ura3-52 ste11::KanMX6</i>                   | This study                       |
| PC2545              | <i>MATa ste4 fus1-lacZ::NAT FUS1-HIS3 ura3-52 ste12::KanMX6</i>                   | PITONIAK <i>et al.</i> , 2009    |
| PC2687              | <i>MATa ste4 FUS1-lacZ FUS1-HIS3 ura3-52 MSB2-HA ste12::KIURA3</i>                | PITONIAK <i>et al.</i> , 2009    |
| PC2691              | <i>MATa ste4 FUS1-lacZ FUS1-HIS3 ura3-52 FLO11-HA ste12::KIURA3</i>               | KARUNANITHI <i>et al.</i> , 2010 |
| PC2738              | <i>MATa ste4 FUS1-lacZ FUS1-HIS3 ura3-52 bem4::KIURA3</i>                         | This study                       |
| PC2754              | <i>MATa ste4 FUS1-lacZ FUS1-HIS3 ura3-52 BEM4-GFP::KanMx6</i>                     | This study                       |
| PC2964              | <i>MATa ste4 FUS1-lacZ FUS1-HIS3 ura3-52 ssk1::NAT bem4::KIURA3</i>               | This study                       |
| PC3014              | <i>MATa ste4 FUS1-lacZ FUS1-HIS3 ura3-52 ssk1::NAT ste11::URA3 bem4::HYG</i>      | This study                       |
| PC3016              | <i>MATa ste4 FUS1-lacZ FUS1-HIS3 ura3-52 bem4::HYG</i>                            | This study                       |
| PC3098              | <i>MATa ste4 FUS1-lacZ FUS1-HIS3 ura3-52 mig1::HYG</i>                            | KARUNANITHI and CULLEN 2013      |
| PC3166              | <i>MATa ste4 FUS1-lacZ FUS1-HIS3 ura3-52 rdi1::KIURA3</i>                         | This study                       |
| PC3206              | <i>MATa ste4 FUS1-lacZ FUS1-HIS3 ura3-52 cap2::KIURA3</i>                         | This study                       |
| PC3214              | <i>MATa ste4 FUS1-lacZ FUS1-HIS3 ura3-52 aip1::KIURA3</i>                         | This study                       |
| PC3226              | <i>MATa ste4 FUS1-lacZ FUS1-HIS3 ura3-52 bbc1::KIURA3</i>                         | This study                       |
| PC3286              | <i>MATa ste4 FUS1-lacZ FUS1-HIS3 ura3-52 GAL-BEM4::KanMx6</i>                     | This study                       |
| PC3341              | <i>MATa ura3-52 bem4::KIURA3</i>                                                  | This study                       |
| PC3343              | <i>MATa ura3-52 bem4::HYG</i>                                                     | This study                       |
| PC3387              | <i>MATa ste4 FUS1-lacZ FUS1-HIS3 ura3-52 GAL-SHO1::KanMX6 bem4::KIURA3</i>        | This study                       |
| PC3390              | <i>MATa ste4 FUS1-lacZ FUS1-HIS3 ura3-52 MSB2<sup>100-818</sup> bem4::KIURA3</i>  | This study                       |
| PC3391              | <i>MATa ste4 FUS1-lacZ FUS1-HIS3 ura3-52 rga1::NAT</i>                            | This study                       |
| PC3392              | <i>MATa ste4 FUS1-lacZ FUS1-HIS3 ura3-52 ste12::KanMX6</i>                        | This study                       |

|                     |                                                                                            |                                |
|---------------------|--------------------------------------------------------------------------------------------|--------------------------------|
|                     | <i>rgal::NAT</i>                                                                           |                                |
| PC3393              | <i>MATa ste4 FUS1-lacZ FUS1-HIS3 ura3-52 bem4::HYG rgal::NAT</i>                           | This study                     |
| PC3398              | <i>MATa ste4 FUS1-lacZ FUS1-HIS3 ura3-52 BEM4-HA::KanMx6</i>                               | This study                     |
| PC3448              | <i>MATa ste4 FUS1-lacZ FUS1-HIS3 ura3-52 BEM4-HA::KanMx6</i><br><i>pGFP-CDC42 URA3</i>     | This study                     |
| PC3495              | <i>MATa ste4 FUS1-lacZ FUS1-HIS3 ura3-52 ent2::KIURA3</i>                                  | This study                     |
| PC3496              | <i>MATa ste4 FUS1-lacZ FUS1-HIS3 ura3-52 far1::KIURA3</i>                                  | This study                     |
| PC3497              | <i>MATa ste4 FUS1-lacZ FUS1-HIS3 ura3-52 msb1::KIURA3</i>                                  | This study                     |
| PC3498              | <i>MATa ste4 FUS1-lacZ FUS1-HIS3 ura3-52 msb4::KIURA3</i>                                  | This study                     |
| PC3499              | <i>MATa ste4 FUS1-lacZ FUS1-HIS3 ura3-52 tos2::KIURA3</i>                                  | This study                     |
| PC3500              | <i>MATa ste4 FUS1-lacZ FUS1-HIS3 ura3-52 sla2::KIURA3</i>                                  | This study                     |
| PC3501              | <i>MATa ste4 FUS1-lacZ FUS1-HIS3 ura3-52 bem2::KIURA3</i>                                  | This study                     |
| PC3502              | <i>MATa ste4 FUS1-lacZ FUS1-HIS3 ura3-52 mdg1::KIURA3</i>                                  | This study                     |
| PC3503              | <i>MATa ste4 FUS1-lacZ FUS1-HIS3 ura3-52 bzz1::KIURA3</i>                                  | This study                     |
| PC3525 <sup>d</sup> | <i>MATa ste4 FUS1-HIS3 ura3-52 pmi40-101 bem4::KIURA3</i>                                  | This study                     |
| PC3526              | <i>MATa ste4 FUS1-lacZ FUS1-HIS3 ura3-52 leu2::HYG BEM4-HA::GENT</i>                       | This study                     |
| PC3541              | <i>MATa ste4 FUS1-lacZ FUS1-HIS3 ura3-52 pGFP-CDC42 URA3</i>                               | This study                     |
| PC3542              | <i>MATa ste4 FUS1-lacZ FUS1-HIS3 ura3-52 bem4::HYG pGFP-CDC42 URA3</i>                     | This study                     |
| PC3544              | <i>MATa ura3-52 bem4::NAT</i>                                                              | This study                     |
| PC3551              | <i>MATa ste4 FUS1-lacZ FUS1-HIS3 ura3-52 leu2::HYG bem4::NAT</i>                           | This study                     |
| PC3722              | <i>MATa ste4 FUS1-lacZ FUS1-HIS3 ura3-52 BEM4<sup>600-633</sup>-HA::KanMx6</i>             | This study                     |
| PC3750              | <i>MATa ste4 FUS1-lacZ FUS1-HIS3 ura3-52 tmn2::KIURA3</i>                                  | This study                     |
| PC3752              | <i>MATa ste4 FUS1-lacZ FUS1-HIS3 ura3-52 opy2::KIURA3</i>                                  | KARUNANITHI and CULLEN<br>2013 |
| PC3754              | <i>MATa ste4 FUS1-lacZ FUS1-HIS3 ura3-52 skm1::KIURA3</i>                                  | This study                     |
| PC3756              | <i>MATa ste4 FUS1-lacZ FUS1-HIS3 ura3-52 boi1::KIURA3</i>                                  | This study                     |
| PC3758              | <i>MATa ste4 FUS1-lacZ FUS1-HIS3 ura3-52 boi2::KIURA3</i>                                  | This study                     |
| PC3760              | <i>MATa ste4 FUS1-lacZ FUS1-HIS3 ura3-52 rho2::KIURA3</i>                                  | This study                     |
| PC3762              | <i>MATa ste4 FUS1-lacZ FUS1-HIS3 ura3-52 rho4::KIURA3</i>                                  | This study                     |
| PC3766              | <i>MATa ste4 FUS1-lacZ FUS1-HIS3 ura3-52 gic1::KIURA3</i>                                  | This study                     |
| PC3771              | <i>MATa ste4 FUS1-lacZ FUS1-HIS3 ura3-52 gic2::KIURA3</i>                                  | This study                     |
| PC3862              | <i>MATa ura3-52 ste4 FUS1-lacZ FUS1-HIS3 ste11::NAT</i>                                    | This study                     |
| PC3863              | <i>MATa ura3-52 ste4 FUS1-lacZ FUS1-HIS3 ste50::NAT</i>                                    | This study                     |
| PC3865              | <i>MATa ura3-52 ste4 FUS1-lacZ FUS1-HIS3 get3::KIURA3</i>                                  | This study                     |
| PC3867              | <i>MATa ura3-52 ste4 FUS1-lacZ FUS1-HIS3 gin4::KIURA3</i>                                  | This study                     |
| PC3870              | <i>MATa ura3-52 ste4 FUS1-lacZ FUS1-HIS3 opy1::KIURA3</i>                                  | This study                     |
| PC3874              | <i>MATa ste4 FUS1-lacZ FUS1-HIS3 ura3-52 sbe22::NAT</i>                                    | This study                     |
| PC3876              | <i>MATa ste4 FUS1-lacZ FUS1-HIS3 ura3-52 pbs2 bem4::KIURA3</i>                             | This study                     |
| PC3884              | <i>MATa ste4 FUS1-lacZ FUS1-HIS3 ura3-52 leu2::HYG bem4::NAT</i><br><i>pCDC24-GFP LEU2</i> | This study                     |
| PC3908              | <i>MATa ura3-52 bem4::HYG / MATa ura3-52 bem4::NAT</i>                                     | This study                     |
| PC3924              | <i>MATa ste4 FUS1-lacZ FUS1-HIS3 ura3-52 bag7::KIURA3</i>                                  | This study                     |
| PC3998              | <i>MATa ste4 FUS1-lacZ FUS1-HIS3 ura3-52 GAL-BEM4<sup>1-300</sup>::KanMx6</i>              | This study                     |
| PC4056              | <i>MATa ste4 FUS1-lacZ FUS1-HIS3 ura3-52 sbe2::KIURA3</i>                                  | This study                     |
| PC4060              | <i>MATa ste4 FUS1-lacZ FUS1-HIS3 ura3-52 sbe22::NAT</i><br><i>sbe2::KIURA3</i>             | This study                     |
| PC4094              | <i>MATa ste4 FUS1-lacZ FUS1-HIS3 ura3-52 GAL-BEM4<sup>1-200</sup>::KanMx6</i>              | This study                     |
| PC4182              | <i>MATa ste4 FUS1-lacZ FUS1-HIS3 ura3-52 FLO11-HA</i><br><i>bem4::KIURA3</i>               | This study                     |
| PC4256              | <i>MATa ura3-52 ste4 FUS1-lacZ FUS1-HIS3 rsr1::NAT</i>                                     | This study                     |
| PC4382              | <i>MATa ura3-52 ste4 FUS1-lacZ FUS1-HIS3 gic1::KIURA3 gic2::NAT</i>                        | This study                     |
| PC4729              | <i>MATa ura3-52 ste12::NAT</i>                                                             | This study                     |
| PC4805              | <i>MATa ste4 FUS1-lacZ FUS1-HIS3 ura3-52 BEM4<sup>16-99</sup>-GFP::KanMx6</i>              | This study                     |



|        |                                                                                           |            |
|--------|-------------------------------------------------------------------------------------------|------------|
| PC4807 | <i>MATa ste4 FUS1-lacZ FUS1-HIS3 ura3-52 BEM4<sup>99-200</sup>-GFP::KanMx6</i>            | This study |
| PC4809 | <i>MATa ste4 FUS1-lacZ FUS1-HIS3 ura3-52 BEM4<sup>200-300</sup>-GFP::KanMx6</i>           | This study |
| PC4811 | <i>MATa ste4 FUS1-lacZ FUS1-HIS3 ura3-52 BEM4<sup>300-400</sup>-GFP::KanMx6</i>           | This study |
| PC4882 | <i>MATa ste4 FUS1-lacZ FUS1-HIS3 ura3-52 BEM4<sup>T619A</sup>-GFP::KanMx6</i>             | This study |
| PC4950 | <i>MATa ste4 FUS1-lacZ FUS1-HIS3 ura3-52 STE11-GFP::KanMX6</i>                            | This study |
| PC4952 | <i>MATa ste4 FUS1-lacZ FUS1-HIS3 ura3-52 bem4::HYG STE11-GFP::KanMX6</i>                  | This study |
| PC4954 | <i>MATa ura3-52 ste4 FUS1-lacZ FUS1-HIS3 BEM-HA::NAT STE11-GFP::KanMX6</i>                | This study |
| PC4970 | <i>MATa ste4 FUS1-lacZ FUS1-HIS3 ura3-52 cdc24::NAT pRS316-CDC24</i>                      | This study |
| PC4982 | <i>MATa ura3-52 ste50::NAT</i>                                                            | This study |
| PC5124 | <i>MATa ste4 FUS1-lacZ FUS1-HIS3 ura3-52 cdc24::NAT pYEp351-CDC24-GFP</i>                 | This study |
| PC5125 | <i>MATa ste4 FUS1-lacZ FUS1-HIS3 ura3-52 cdc24::NAT pYEp351-MYR-CDC24-GFP</i>             | This study |
| PC5376 | <i>MATa ste4 FUS1-lacZ FUS1-HIS3 ura3-52 BEM4-GFP::KanMX6 sho1::NAT</i>                   | This study |
| PC5387 | <i>MATa ste4 FUS1-lacZ FUS1-HIS3 ura3-52 leu2::HYG pCDC24-GFP LEU2</i>                    | This study |
| PC5388 | <i>MATa ste4 FUS1-lacZ FUS1-HIS3 ura3-52 leu2::HYG BEM4-HA::GENT pCDC24-GFP LEU2</i>      | This study |
| PC5965 | <i>MATa ste4 FUS1-lacZ FUS1-HIS3 ura3-52 cdc24::NAT sho1::KanMX6 YEp351-CDC24-GFP</i>     | This study |
| PC5970 | <i>MATa ste4 FUS1-lacZ FUS1-HIS3 ura3-52 cdc24::NAT bem4::KanMX6 YEp351-CDC24-GFP</i>     | This study |
| PC5971 | <i>MATa ste4 FUS1-lacZ FUS1-HIS3 ura3-52 cdc24::NAT bem4::KanMX6 YEp351-MYR-CDC24-GFP</i> | This study |
| PC6013 | <i>MATa ste4 FUS1-lacZ FUS1-HIS3 ura3-52 cdc24::NAT sho1::KanMX6 YEp351-CDC24-GFP</i>     | This study |
| PC6080 | <i>MATa ste4 FUS1-lacZ FUS1-HIS3 ura3-52 cdc24::NAT pRS315-cdc24-4</i>                    | This study |
| PC6081 | <i>MATa ste4 FUS1-lacZ FUS1-HIS3 ura3-52 cdc24::NAT pRS425-cdc24-4</i>                    | This study |

- All strains are  $\Sigma$ 1278b background unless otherwise indicated.
- S288c background ordered deletion collection control strain.
- Deletion strains from the *MATa* ordered deletion collection in the S288c background were also used in this study.
- 246-1-1 strain background.

**Table S2. Plasmids used in this study.**

| Strain | Description                                       | Reference                            |
|--------|---------------------------------------------------|--------------------------------------|
| PC1027 | <i>pMSB2<sup>CG</sup>-lacZ URA3</i>               | PITONIAK <i>et al.</i> , 2009        |
| PC1041 | <i>pKSS1-lacZ LEU2</i>                            | ROBERTS <i>et al.</i> , 2000         |
| PC1042 | <i>pPGU1-lacZ LEU2</i>                            | ROBERTS <i>et al.</i> , 2000         |
| PC1043 | <i>pSVS1-lacZ LEU2</i>                            | ROBERTS <i>et al.</i> , 2000         |
| PC1044 | <i>pYLR042c-lacZ LEU2</i>                         | ROBERTS <i>et al.</i> , 2000         |
| PC1236 | <i>pλYES-GAL-MID2 URA3</i>                        | BIRKAYA <i>et al.</i> , 2009         |
| PC1364 | <i>pCDC12-GFP URA3</i>                            | LIPPINCOTT and LI, 1998              |
| PC1368 | <i>pFgTY-lacZ URA3</i>                            | LALOUX <i>et al.</i> , 1994          |
| PC1405 | <i>pFRE-lacZ URA3</i>                             | MADHANI <i>et al.</i> , 1997         |
| PC1422 | <i>pRS315</i>                                     | SIKORSKI and HEITER, 1989            |
| PC1441 | <i>pSTE11-4 YCp50 URA3</i>                        | STEVENSON <i>et al.</i> , 1992       |
| PC1442 | <i>pSTE11-1 YCp50 URA3</i>                        | STEVENSON <i>et al.</i> , 1992       |
| PC1601 | <i>pRS316-SHO1-GFP URA3</i>                       | MARLES <i>et al.</i> , 2004          |
| PC1614 | <i>pRS316-SHO1-GFP (D16H) URA3</i>                | MARLES <i>et al.</i> , 2004          |
| PC1696 | <i>pMSB2-GFP URA3 (pMSB2*)</i>                    | VADAIE <i>et al.</i> , 2008          |
| PC1883 | <i>pGFP-BUD8 LEU2</i>                             | HARKINS <i>et al.</i> , 2001         |
| PC1885 | <i>pMPY-3xHA</i>                                  | SCHNEIDER <i>et al.</i> 1995         |
| PC2205 | <i>pNAT</i>                                       | GOLDSTEIN <i>et al.</i> , 1999       |
| PC2206 | <i>pHYG</i>                                       | GOLDSTEIN <i>et al.</i> , 1999       |
| PC2242 | <i>pGEX-2T-PBD</i>                                | OTSUKI <i>et al.</i> , 2001          |
| PC2432 | <i>pRS316 SHO1-HA::KANMX6 (D16H) URA3</i>         | VADAIE <i>et al.</i> , 2008          |
| PC2433 | <i>pRS316 SHO1 (P120L)-HA::KANMX6 (D16H) URA3</i> | VADAIE <i>et al.</i> , 2008          |
| PC2435 | <i>pRS316 SHO1 (S220F)-HA::KANMX6 (D16H) URA3</i> | VADAIE <i>et al.</i> , 2008          |
| PC2445 | <i>pRS316-SHO1-ASH3-GFP URA3</i>                  | ZARRINPAR <i>et al.</i> , 2004       |
| PC2560 | <i>pRS426 GFP-2xPH URA3</i>                       | GARRENTON <i>et al.</i> , 2010       |
| PC3132 | <i>pMSB2-lacZ URA3</i>                            | PITONIAK <i>et al.</i> , 2009        |
| PC3133 | <i>pHKR1-lacZ URA3</i>                            | PITONIAK <i>et al.</i> , 2009        |
| PC3483 | <i>pOAD LEU2</i>                                  | MCCRAITH <i>et al.</i> , 2000        |
| PC3484 | <i>pOAD-CDC42 LEU2</i>                            | DREES <i>et al.</i> , 2001           |
| PC3485 | <i>pOAD-CDC24 LEU2</i>                            | DREES <i>et al.</i> , 2001           |
| PC3486 | <i>pOBD-2-CDC11 TRP</i>                           | DREES <i>et al.</i> , 2001           |
| PC3488 | <i>pOBD-2-CDC42 TRP</i>                           | DREES <i>et al.</i> , 2001           |
| PC3489 | <i>pOBD-2-CDC42<sup>D57Y</sup> TRP</i>            | DREES <i>et al.</i> , 2001           |
| PC3621 | <i>pGFP-CDC24 LEU2</i>                            | WEDLICH-SOLDNER <i>et al.</i> , 2004 |
| PC4190 | <i>pOAD-BEM4 LEU2</i>                             | DREES <i>et al.</i> , 2001           |
| PC4204 | <i>pRS316</i>                                     | SIKORSKI and HEITER, 1989            |
| PC4206 | <i>pOBD-2 TRP</i>                                 | MCCRAITH <i>et al.</i> , 2000        |
| PC4214 | <i>pBEM4-lacZ URA3</i>                            | This study                           |
| PC4222 | <i>pGBDU-CI-RAS2 URA3</i>                         | This study                           |
| PC4223 | <i>pGBDU-CI-RAS2(V19) URA3</i>                    | This study                           |
| PC4224 | <i>pGBDU-CI-PBS2 URA3</i>                         | This study                           |
| PC4225 | <i>pGBDU-CI-CDC24 URA3</i>                        | This study                           |
| PC4226 | <i>pGBDU-CI-CDC24<sup>PB1</sup> URA3</i>          | This study                           |
| PC4369 | <i>pGBDU-CI-STE11 URA3</i>                        | This study                           |
| PC4370 | <i>pGBDU-CI-STE50 URA3</i>                        | This study                           |
| PC4394 | <i>pRL116 pGFP-STE20 URA3</i>                     | LAMSON <i>et al.</i> , 2002          |
| PC4460 | <i>pOBD-2-BEM4<sup>Δ1-200</sup> TRP</i>           | This study                           |
| PC4462 | <i>pOBD-2-BEM4<sup>Δ1-300</sup> TRP</i>           | This study                           |
| PC4464 | <i>pOBD-2-BEM4<sup>Δ1-400</sup> TRP</i>           | This study                           |
| PC4466 | <i>pOBD-2-BEM4<sup>Δ1-500</sup> TRP</i>           | This study                           |
| PC4506 | <i>pOAD-BEM4<sup>Δ1-100</sup> LEU2</i>            | This study                           |
| PC4507 | <i>pOAD-BEM4<sup>Δ1-200</sup> LEU2</i>            | This study                           |
| PC4509 | <i>pOAD-BEM4<sup>Δ1-300</sup> LEU2</i>            | This study                           |

---

|        |                                                 |                            |
|--------|-------------------------------------------------|----------------------------|
| PC4511 | <i>pOAD-BEM4<sup>Δ1-100</sup> LEU2</i>          | This study                 |
| PC4513 | <i>pOAD-BEM4<sup>Δ1-100</sup> LEU2</i>          | This study                 |
| PC4590 | <i>pOBD-2-RSRI TRP</i>                          | DREES <i>et al.</i> , 2001 |
| PC4683 | <i>pGBDU-C1-KSS1 URA3</i>                       | This study                 |
| PC4684 | <i>pGBDU-C1-STE7 URA3</i>                       | This study                 |
| PC4686 | <i>pGBDU-C1-STE11-1 URA3</i>                    | This study                 |
| PC4687 | <i>pGBDU-C1-CDC42<sup>Q61L/C188S</sup> URA3</i> | This study                 |
| PC4688 | <i>pGBDU-C1-STE11-4 URA3</i>                    | This study                 |
| PC4691 | <i>pGBDU-C1-CDC42<sup>D118A</sup> URA3</i>      | This study                 |
| PC4697 | <i>pGBDU-C1-STE11-Nterm</i>                     | This study                 |
| PC4399 | <i>pRS316-CDC24</i>                             | This study                 |
| PC4700 | <i>pGBDU-C1-STE11-kinase</i>                    | This study                 |
| PC4731 | <i>pCTT1-lacZ URA3</i>                          | This study                 |
| PC4878 | <i>pFUS1-lacZ URA3</i>                          | This study                 |
| PC5155 | <i>pRS315-CDC24-GFP</i>                         | This study                 |
| PC5157 | <i>pYEp351-CDC24-GFP</i>                        | This study                 |
| PC5161 | <i>pYEp-351-MYR-CDC24-GFP</i>                   | This study                 |
| PC5806 | <i>pGEX4T1-CDC24</i>                            | This study                 |
| PC5807 | <i>pMAL-C2-BEM4</i>                             | This study                 |
| PC5960 | <i>pET28b-CDC42</i>                             | This study                 |
| PC6045 | <i>pGEX4T1-STE11</i>                            | This study                 |
| PC6077 | <i>pRS315-CDC24-4</i>                           | This study                 |
| PC6078 | <i>pRS425-CDC24-4</i>                           | This study                 |
| PC6235 | <i>pMAL-C2-Bem4 1-100</i>                       | This study                 |
| PC6236 | <i>pMAL-C2-Bem4 1-200</i>                       | This study                 |
| PC6237 | <i>pMAL-C2-Bem4 1-300</i>                       | This study                 |
| PC6238 | <i>pMAL-C2-Bem4 1-400</i>                       | This study                 |
| PC6239 | <i>pMAL-C2-Bem4 1-500</i>                       | This study                 |
| PC6240 | <i>pMAL-C2-Bem4 1-600</i>                       | This study                 |
| PC6272 | <i>pYEp351-pTEF2-BEM4-GFP</i>                   | This study                 |
| PC6273 | <i>pYEp352-pTEF2-BEM4-GFP</i>                   | This study                 |
| PC6274 | <i>pGEX4T1-CDC24-PB1Δ</i>                       | This study                 |
| PC6275 | <i>pGEX4T1-CDC24-CHΔ</i>                        | This study                 |
| PC6276 | <i>pGEX4T1-CDC24-PHΔPB1Δ</i>                    | This study                 |
| PC6277 | <i>pGEX4T1-CDC24-CHΔPB1Δ</i>                    | This study                 |
| PC6278 | <i>pGEX4T1-CDC24-PHΔ</i>                        | This study                 |
| PC6279 | <i>pGEX4T1-CDC24-PH domain only</i>             | This study                 |
| PC6280 | <i>pRS425-CDC24-PHΔ</i>                         | This study                 |

---

**Table S3. Deletion analysis of Cdc42p network components for phenotypes in the filamentous growth response.**

| Gene Deleted      | Strain | Plate-washing (a) | <i>ste4 FUS1-HIS3</i> (b) | Kss1~P | Score | Final |
|-------------------|--------|-------------------|---------------------------|--------|-------|-------|
| Wild Type Control | PC999  | +++               | HIS +                     | +++    | 0     | 0     |
| <i>MSB2</i>       | PC948  | +/-               | HIS -                     | +      | -2    | -2    |
| <i>SHO1</i>       | PC1531 | +/-               | HIS -                     | +      | -2    | -2    |
| <i>OPY2</i>       | PC3752 | -                 | HIS -                     | -      | -3    | -3    |
| <i>STE20</i>      | PC549  | -                 | HIS -                     | -      | -3    | -3    |
| <i>STE50</i>      | PC3863 | -                 | HIS -                     | -      | -3    | -3    |
| <i>STE11</i>      | PC2544 | -                 | HIS -                     | -      | -3    | -3    |
| <i>STE12</i>      | PC539  | -                 | HIS -                     | -      | -3    | -3    |
| <i>STE4</i>       | PC538  | +++               | HIS +                     | ++++   | -1    | -1    |
| <i>MSB1</i>       | PC3497 | +++               | HIS +                     | N/D    | 0     | 0     |
| <i>GIP1</i>       | PC955  | +++               | HIS +                     | N/D    | 0     | 0     |
| <i>MSB4</i>       | PC3498 | +++               | HIS +                     | N/D    | 0     | 0     |
| <i>MAD2</i>       | PC967  | +++               | HIS +                     | N/D    | 0     | 0     |
| <i>MAD3</i>       | PC968  | +++               | HIS +                     | N/D    | 0     | 0     |
| <i>BEM4</i>       | PC2738 | -                 | HIS -                     | -      | -3    | -3    |
| <i>GAL4</i>       | PC559  | +++               | HIS +                     | N/D    | 0     | 0     |
| <i>SIP4</i>       | PC568  | +++               | HIS +                     | N/D    | 0     | 0     |
| <i>SNF4</i>       | PC587  | +++               | HIS +                     | N/D    | 0     | 0     |
| <i>MIG1</i>       | PC3098 | +++               | HIS +                     | +++    | 0     | 0     |
| <i>SNF1</i>       | PC560  | +                 | HIS +                     | +      | -1    | -1    |
| <i>RHO2</i>       | PC3760 | +++               | HIS +                     | N/D    | 0     | 0     |
| <i>RHO4</i>       | PC3762 | +++               | HIS +                     | N/D    | 0     | 0     |
| <i>BOI2</i>       | PC3758 | +++               | HIS +                     | N/D    | 0     | 0     |
| <i>BOI1</i>       | PC3756 | +++               | HIS +                     | N/D    | 0     | 0     |
| <i>RSR1</i>       | PC717  | +++               | HIS -                     | N/D    | -1    | -1    |
| <i>SBE2</i>       | PC4056 | +++               | HIS +                     | N/D    | 0     | 0     |

|                  |           |     |         |     |   |  |
|------------------|-----------|-----|---------|-----|---|--|
| <i>SBE22</i> (c) | PC3875    | +++ | HIS +   | N/D | 0 |  |
| <i>RDI1</i>      | PC3166    | +++ | HIS +   | N/D | 0 |  |
| <i>GIC1</i>      | PC3766    | +++ | HIS +   | N/D | 0 |  |
| <i>GIC2</i> (d)  | PC3771    | +++ | HIS +   | N/D | 0 |  |
| <i>FAR1</i>      | PC3496    | +++ | HIS +   | N/D | 0 |  |
| <i>STE5</i>      | PC720     | +++ | HIS +   | N/D | 0 |  |
| <i>ENT2</i>      | PC3495    | +++ | HIS +   | N/D | 0 |  |
| <i>TOS2</i>      | PC3499    | +++ | HIS +   | N/D | 0 |  |
| <i>RGA1</i>      | PC1994    | +++ | HIS +++ | N/D | 3 |  |
| <i>RGA2</i>      | PC479     | +++ | N/D     | N/D | 0 |  |
| <i>BEM3</i>      | PC480     | +++ | N/D     | N/D | 0 |  |
| <i>BZZ1</i>      | PC3503    | +++ | HIS +   | N/D | 0 |  |
| <i>BBC1</i>      | PC3226    | +++ | HIS +   | N/D | 0 |  |
| <i>CAP2</i>      | PC3206    | +++ | HIS +   | N/D | 0 |  |
| <i>SLA2</i>      | PC3500    | +++ | HIS +   | N/D | 0 |  |
| <i>AIP1</i>      | PC3214    | +++ | HIS +   | N/D | 0 |  |
| <i>BN11</i>      | PC544     | +++ | HIS +   | N/D | 0 |  |
| <i>PEA2</i>      | PC551     | +++ | HIS +   | N/D | 0 |  |
| <i>SPA2</i>      | PC554     | +++ | HIS +   | N/D | 0 |  |
| <i>BUD6</i>      | PC916     | +++ | HIS +   | N/D | 0 |  |
| <i>CLA4</i>      | PC969     | +++ | HIS +++ | N/D | 2 |  |
| <i>BEM2</i>      | PC3501    | +++ | HIS +   | N/D | 0 |  |
| <i>BUD14</i>     | PC842 (e) | +++ | HIS ++  | N/D | 1 |  |
| <i>TMN2</i>      | PC3750    | +++ | HIS +   | N/D | 0 |  |
| <i>MDG1</i>      | PC3502    | +++ | HIS +   | N/D | 0 |  |
| <i>HSL1</i>      | PC552     | +++ | HIS +   | N/D | 0 |  |
| <i>HSL7</i>      | PC555     | +++ | HIS +   | N/D | 0 |  |
| <i>SKM1</i>      | PC3754    | +++ | HIS +   | N/D | 0 |  |
| <i>GET3</i>      | PC3865    | +++ | HIS +   | N/D | 0 |  |

|                 |        |     |       |     |   |  |
|-----------------|--------|-----|-------|-----|---|--|
| <i>GIN4</i>     | PC3867 | +++ | HIS + | N/D | 0 |  |
| <i>OPY1</i>     | PC3870 | +++ | HIS + | N/D | 0 |  |
| <i>BAG7</i>     | PC3924 | +++ | HIS + | N/D | 0 |  |
| <i>BEM1 (f)</i> | N/A    | N/A | N/A   | ++  | 0 |  |

- a. The plate-washing assay was performed on mutants grown for 72h at 30C on YEPD semi-solid agar media.
- b. Genes were disrupted in PC538 (*MAT a ste4 FUS1-HIS3 FUS1-lacZ ura3-52*) using the *KIURA3* cassette or GENT cassette. Reporter activity was assessed by growth on SD-HIS media compared to SD+AA media.
- c. The *sbe2 sbe22* double mutant (PC4060) was also examined.
- d. The *gic1 gic2* double mutant (PC4382) was also examined.
- e. *GAL-GFP-BUD14* allele was examined.
- f. Bem1p is essential in the □1278b background and was tested in S288c background by Kss1p phosphoblot analysis.

A

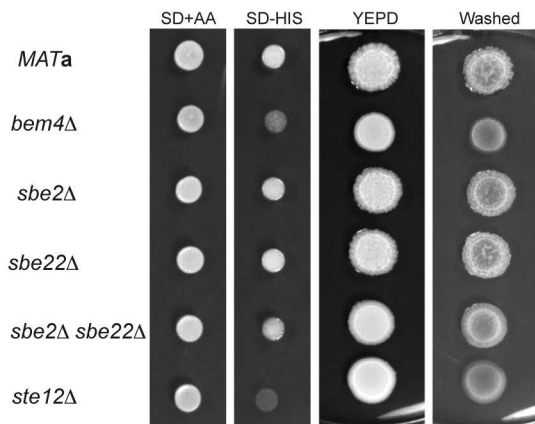

B

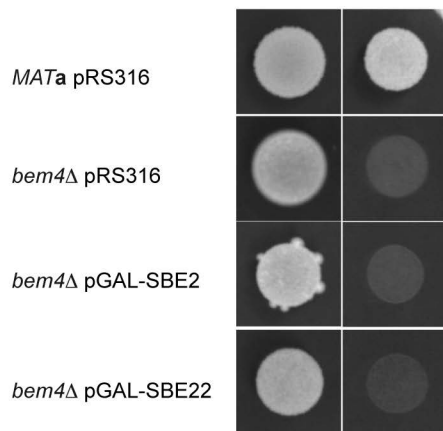

C

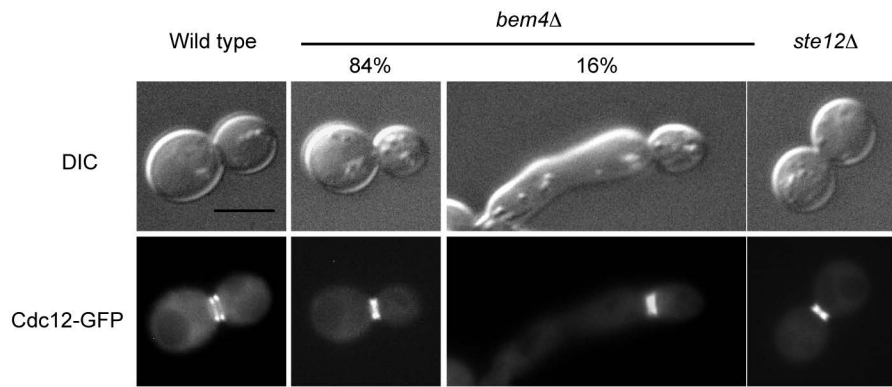

**Fig.\_S2**

**A**

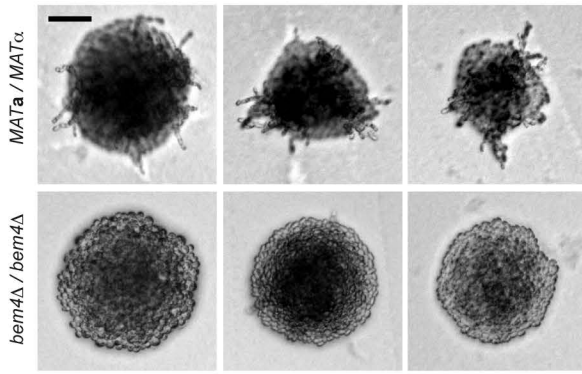

**B**

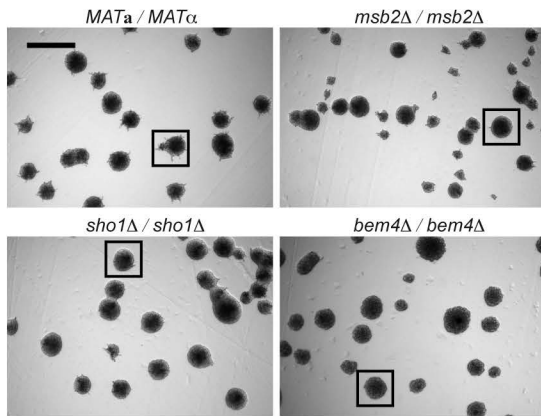

**C**

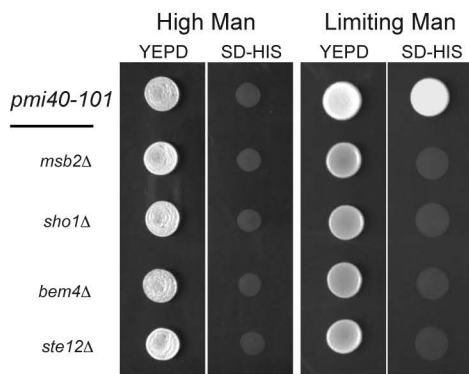

**D**

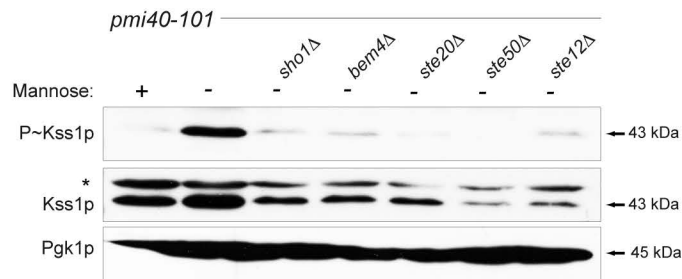

**E**

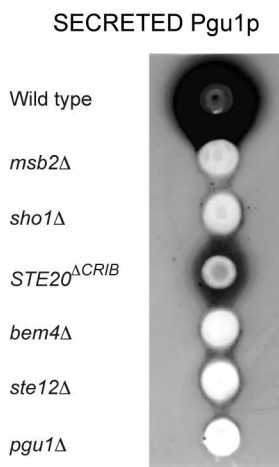

**F**

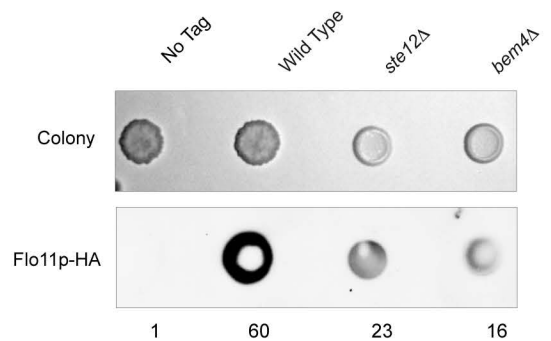





*H. sapiens* -----  
*X. laevis* --MDNLDLAEKIKLTGTECTSDKLDGCLDCLIQALGHNNTESESEKIQQSGTLQLFASILN 59  
*M. musculus* --TDNLSPTLKKIKITAADRTGSELEGCLDCLIQALQNNNAETSEKIQQSGTLQLFANLLT 59  
*D. melanogaster* MATIDDLLEKIKTTSVSPAN---TTNLLCEISATKQPKLFDKHELAECFGLTKCDDTN 57  
*S. cerevisiae* --MDYELIFGQIQP-----IINSSIKDVPMDNVYLGSLVAVMDQLAVS 42

*H. sapiens* -----MRIPCVDAGLISPLVQLLNLSK-DQVLLQTGHALGNICY 38  
*X. laevis* SQSSCASKVAHIVAEATAKNELMRIPCVEADLIPPLVQLLHLSK-DQVLLQTGHALGNICY 118  
*M. musculus* PQASCTAKVADIIAEVAKNEFMRIPCVDAGLISPLVQLLNLSK-DQVLLQTGHALGNICY 118  
*D. melanogaster* VRKEAAKCIAEIKTSVEQRKFKTKRNTIAAFLCELRQVPTSDGSMELPIQICHALGNICY 117  
*S. cerevisiae* LREPSNRDLVGKGTLLLNLRVLEQALDICFHDTSSISLNDKIAFYHISSEVICLAIAII 102

*H. sapiens* SQ-----  
*X. laevis* NNHEGRRITVDQEGGAQIVVDHLRSRCTLTPDPSSEKLMTVFCGMLMNYSSENDSLQTQLIQ 178  
*M. musculus* SHS-----LQAQLIS 129  
*D. melanogaster* LNDPEARLDLILEEGDAVLLRLLDITITIEDVANAAQFIKVRGGLLSNYLLGGEGAKRAME 177  
*S. cerevisiae* NDDNREILLDSGGKLLNYYIGGVLQDEISSDK-----SEDSLVDKIQMRSVV 152

*H. sapiens* -----SKEQFASNTIAEELVLFKFKQI 64  
*X. laevis* MGVIPIVDLVAHVSQNTALTEMCLVAFGNLA--ELESKEQFAANTVAEELVLFKFKQT 236  
*M. musculus* MGVIPTVKLGLGHCHNAALTEMCLVAFGNLA--ELESKEQFASNTIAEELVLFKFKQI 187  
*D. melanogaster* LGVMKKIQGLIDIGASNVQEHEDLLNTPLLSILTENVSDLNDFDSSINQLSRLLAAS 237  
*S. cerevisiae* LLRNFCIGNIKYTENLAPPIRGFLFVLLKTTQYSYLSPEKVVGLDILLNDLKNVNSV 212

*H. sapiens* EHKDREMI FEVLAPLAENDA-IKQLVLAAGLVCECLLEIVQKVDSD-----KEDDIT 116  
*X. laevis* EHEKREVI FEVLAPLAENDA-IKMLVLAAGLVCECLLEIVQKTVNSE-----KDDVA 288  
*M. musculus* EHKDREMI FEVLAPLAENDA-IKQLVLAAGLVCECLLEIVQKVNNS-----KDDVA 239  
*D. melanogaster* NPDLAEMCELLEHYQAESDE-VKILAKDGLCEPTIYNLLEKYKTLAS-----TSFARAL 290  
*S. cerevisiae* QISDLFFLSQYIKKISSVQNKEIQAMDGSAWEAYSNTETKFKFAGQGNQYEYIEKEDDE 272

*H. sapiens* LKTGSDIMV-----LILLGDESMQKLFGGGKGSVFRVSWIPSNNHQLQLAGAATA 169  
*X. laevis* LKTGSDIMV-----LILLGDESMQKLFGGGKGSVFRVSWIPSNNHQLQLAGAATA 341  
*M. musculus* LKTASDIMV-----LILLGDESMQKLFGGGKGSVFRVSWIPSNNHQLQLAGAATA 292  
*D. melanogaster* MKLACEIIV-----LILTGDDSMHYLYTTP--LLKNMVDWLDSTDIDLTLTGVLVAG 340  
*S. cerevisiae* EDVNCETLLNLSTCLETIVAKDETINFNTNEQLVLSMKNLILSLVLESKFTFNKLIYM 332

*H. sapiens* NFARNDANCIMHVDNGIVEKLMDLDR-HVEDGNVTVQHAAISARLAIIPVINKAKMIS 228  
*X. laevis* NFARNDGNCIMHVDSEIVQKLLDLDR-HVEDGNVTVQHAAISARLAIIPVNVKAKMIS 400  
*M. musculus* NFARNDGNCIMHVDNGIVEKLMDLDR-HVEDGNVTVQHAAISARLAIIPVNVKAKMIS 351  
*D. melanogaster* NFARTDSHCIFVFEQQTMMNKLLEVLAKNNGVKDDVRVQLHLSAARLRLVLPKPKNAVIA 400  
*S. cerevisiae* RRLISCAGNISANLTSNKRQESCICETIKSSASSYALAAALMILCNSVASKSDAVALIK 392

*H. sapiens* AGVTEAVIKFLKSEMPVQVFK-LGLTIRMIDAQAEAAEQGKNKVERLVVEWCAKDH 287  
*X. laevis* AGVTEAVIKFLPSEMPVQVFK-LGLTIRMIDAQAEAAEQGKNKVERLVVEWCAKDH 459  
*M. musculus* AGVTEAVIKFLKSEMPVQVFK-LGLTIRMIDAQAEAAEQGKNKVERLVVEWCAKDH 410  
*D. melanogaster* AGLVQTIPLMLEIHQPVQVFK-LGLTIRMIDVQGEKLALELKNKTEIQLVHWKSSDY 459  
*S. cerevisiae* LILSELITQVGSLLQDPLVYQGFIDLRKILNLENTMWLDLKNLFTFQIMRRCHQOTKY 452

*H. sapiens* AG-VMGESNRLLSALIRHSK-SRDVIKTIQV----- 316  
*X. laevis* AG-VMGESNRLLSALIRHSK-SRDVIRTIQV----- 488  
*M. musculus* AG-VMGESNRLLSALIRHSK-SRDVIKTIQV----- 439  
*D. melanogaster* AG-VTGESLRMAWLKHAYLESRIAYALPRKGADAPAEQIADKIPLTQDYDRSSLSSEFLAN 518  
*S. cerevisiae* YNNLRSLLTNLTKTITVLPSEKIHNSISSD-----PTIISF 489

*H. sapiens* SGGIKHIVTMATSEHVIQMNEALVALIAAELGPAEKDASAKLVQILHRLLDADERSA 376  
*X. laevis* SGGIKHIVTMATSEHVIQMNEALVALIAAELGPAEKDASAKLVQILHRLLDADERSA 548  
*M. musculus* SGGIKHIVTMATSEHVIQMNEALVALIAAELGPAEKDASAKLVQILHRLLDADERSA 499  
*D. melanogaster* EGTVEAMVSMMLTAQHILVMQNEALIALCLLSVVYLSQPSSEAQAQLLQDELVKEVWGKLA 578  
*S. cerevisiae* IAEHGTTSCIAMDKLVSKKALPKEAITSLWDSIFKFFQNGOGEQLSISDLFHITKTGV 549

*H. sapiens* PEIIRYNSMVLICALMGSS-ECLHKEVQDLAFLDVVSKLRSHENIS-----VAQ 422  
*X. laevis* PEIIRYNSMVLICAVMGSS-EPLHKEVQKLAFLDVVSKLRSHENIT-----VAQ 594  
*M. musculus* PEIIRYNSMVLICALMGSSGKASSCRSVSMWLSDDKRWIMINDNG-----LKR 546  
*D. melanogaster* ELISKSDTMTKEIVEN--LQNCVNLKSSSQLVAHLEQHNINE-----LLK 623  
*S. cerevisiae* IYLDSEVTVADVNPIENILFKDYIQKLTILELTLSPFKNKDGSESCFNNGKFIAGITIL 609

*H. sapiens* QASLTEQRLTVES----- 435  
*X. laevis* QASLTEQKFTVQS----- 607  
*M. musculus* SSKSFERGIRYQNGVSDNCSNHRQF 572  
*D. melanogaster* SIPILTEYCYTL----- 634  
*S. cerevisiae* NIVNRTKCLTPBEQNLEALAKSFF-- 633

## Arm-like repeats of Bem4p

280 LLNLSTCLETIVAKDETINFNTNEEQVLSMOKNLLI--SLV--CLES--KT  
 325 FNNKLIWMRRLLSACAGNISANLTSNKRQESCICETIKASYALAAALMI  
 377 LCNVASKSDAVALL--K-LISLSELITQVGS-L-LQDPL--QYQGFLDL  
 419 LRKLLN-LENTMW-IDIKDLFTLFO-IMRR--CHEQTKYYNALLNKTTLTV  
 471 LPSSKIHNS-ISSDPTIIS-FIA-EHGTLT-S-CIAMDKLLVS----KKA  
 512 LPKEAIT-SLWDSIFKF--QN-LGQAEQLSISDLFHITKTVGIYL-KDSSV

A

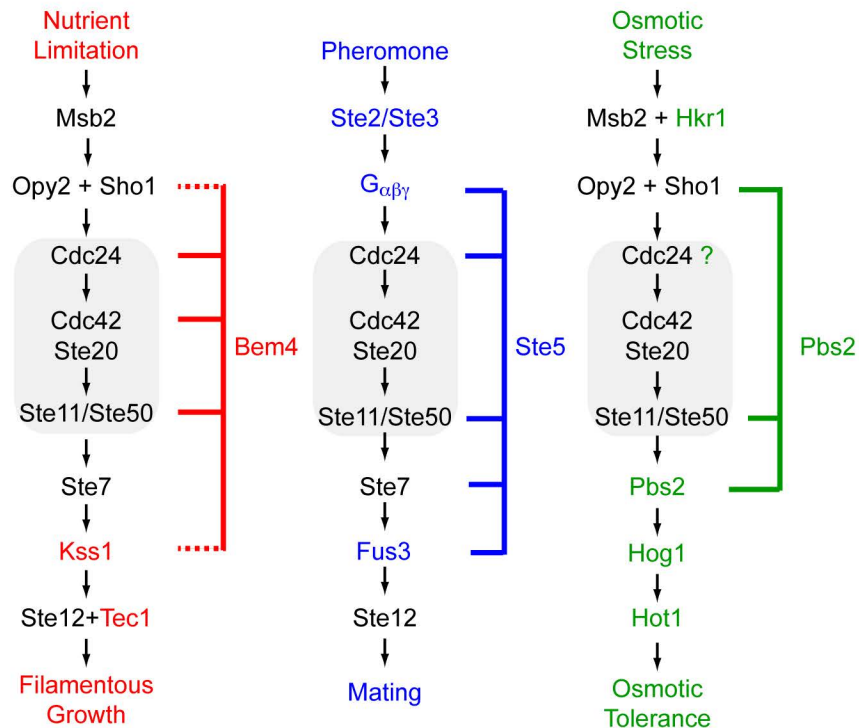

B

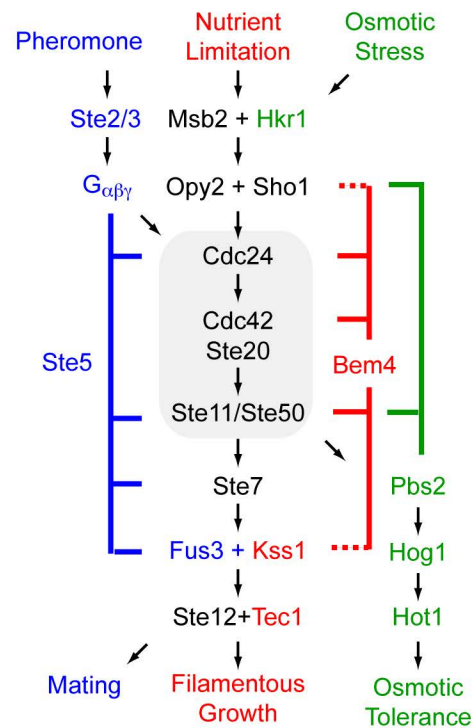

A

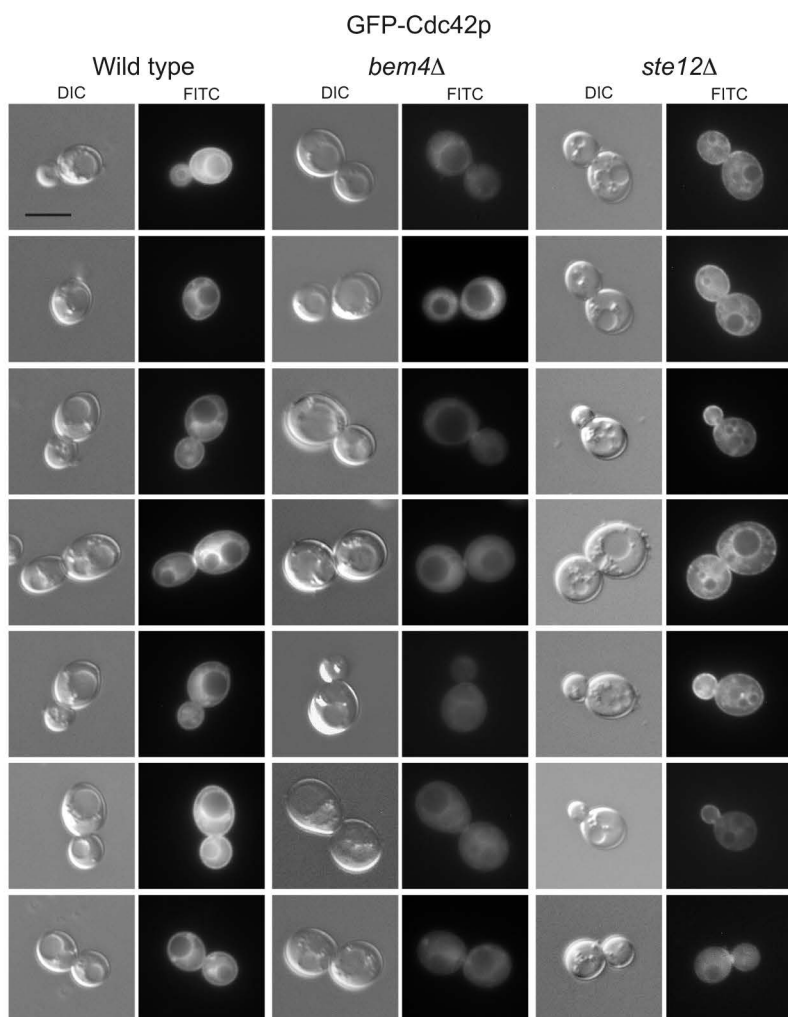

B

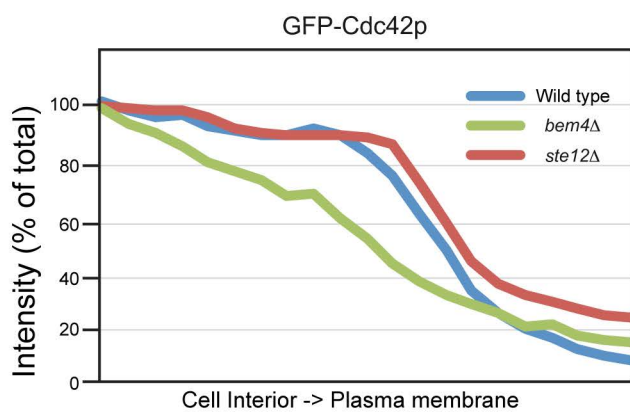

C

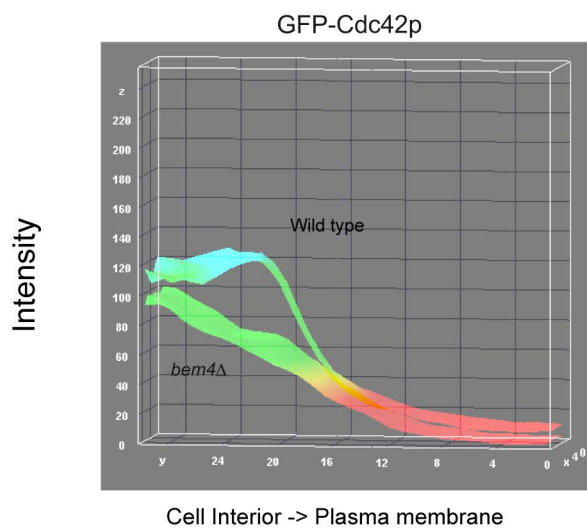

Supplement: MCB.00850-14_zmb999100708so1.pdf [file MCB.00850-14_zmb999100708so1.pdf]
